# Supplementary material for: Early transcriptomic response of Arabidopsis thaliana to polymetallic contamination: implications for the identification of potential biomarkers of metal exposure
Source: Royal Society of Chemistry journal article supplement (doi:10.1039/c6mt00014b), 2016-01-01
Supplement: c6mt00014b1.pdf [file c6mt00014b1.pdf]

## Supplementary Information

### Supplementary Data Set 1

**Table S1:** List and description of differentially downregulated genes ( $\geq 2$ -fold;  $P < 0.05$ ) in *Arabidopsis thaliana* plants under L treatment. FC: Absolute fold-change between L and Control-L (CL) treatments. (P): putative genes.

**Table S2:** List and description of differentially upregulated genes ( $\geq 2$ -fold;  $P < 0.05$ ) in *Arabidopsis thaliana* plants under L treatment. FC: Absolute fold-change between L and Control-L (CL) treatments. (P): putative genes.

**Table S3:** List and description of differentially downregulated genes ( $\geq 2$ -fold;  $P < 0.05$ ) in *Arabidopsis thaliana* plants under H treatment. FC: Absolute fold-change between H and Control-H (CH) treatments. (P): putative genes.

**Table S4:** List and description of differentially upregulated genes ( $\geq 2$ -fold;  $P < 0.05$ ) in *Arabidopsis thaliana* plants under H treatment. FC: Absolute fold-change between H and Control-H (CH) treatments. (P): putative genes.

### Supplementary Data Set 2

**Table S5:** Downregulated genes in *Arabidopsis thaliana* plants shared by both metal (L: low and H: high) treatments. The “Score” was obtained after the sum of gene fold-change (FC) position in each treatment. (P): putative genes. In bold, genes selected for RT-qPCR validation.

**Table S6:** Upregulated genes in *Arabidopsis thaliana* plants shared by both metal (L: low and H: high) treatments. The “Score” was obtained after the sum of gene fold-change (FC) position in each treatment. (P): putative genes. In bold, genes selected for RT-qPCR validation.
